# Supplementary material for: Influence of Au/Pd alloy on an amine functionalised ZnCr LDH–MCM-41 nanocomposite: A visible light sensitive photocatalyst towards one-pot imine synthesis
Source: Royal Society of Chemistry journal article supplement (doi:10.1039/c8cy02603c), 2019-01-01
Supplement: c8cy02603c1.pdf [file c8cy02603c1.pdf]

## Supporting information

### Influence of Au/Pd alloy on amine functionalised ZnCr LDH-MCM-41 nanocomposite; a visible light sensitive photocatalyst for one-pot Imines synthesis

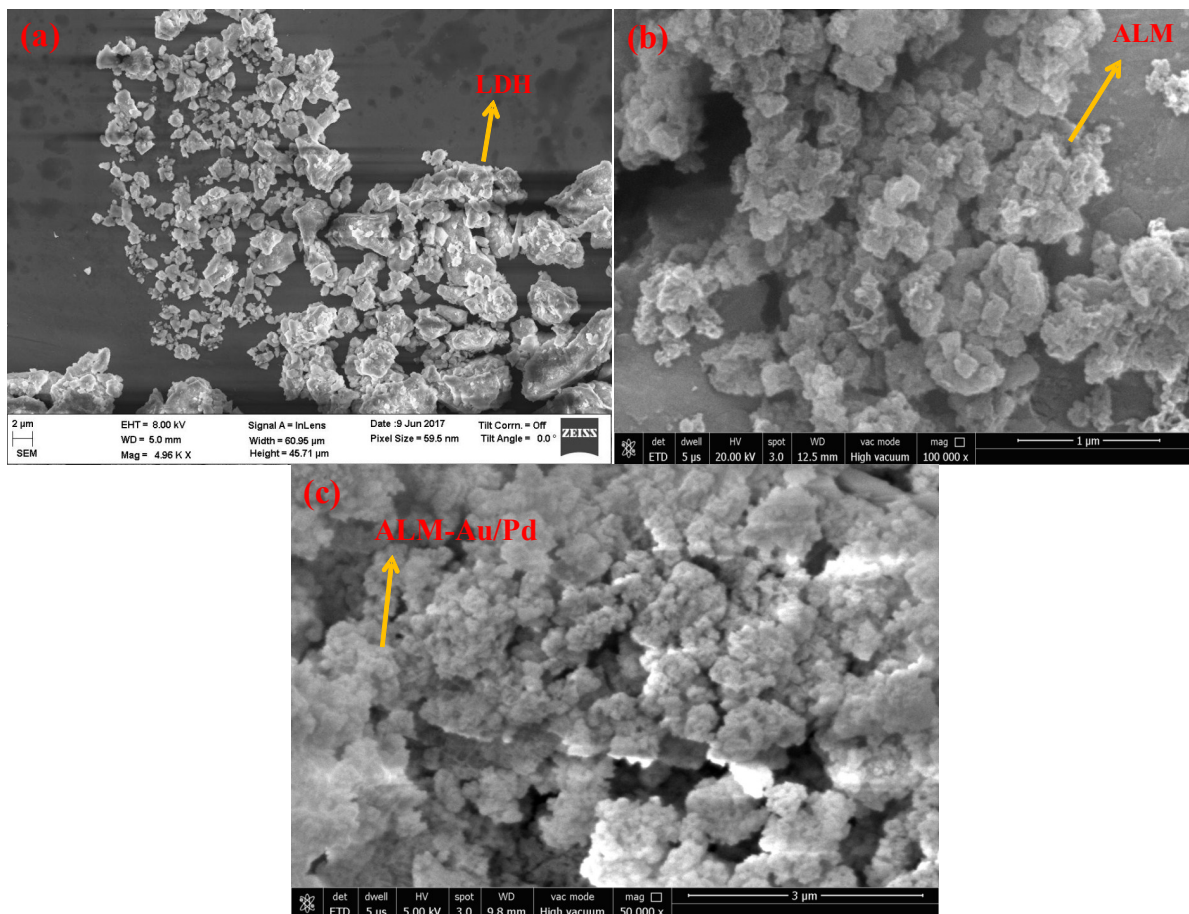

Fig. S1 SEM images of (a)LDH, (b)ALM and (c) ALM-Au/Pd

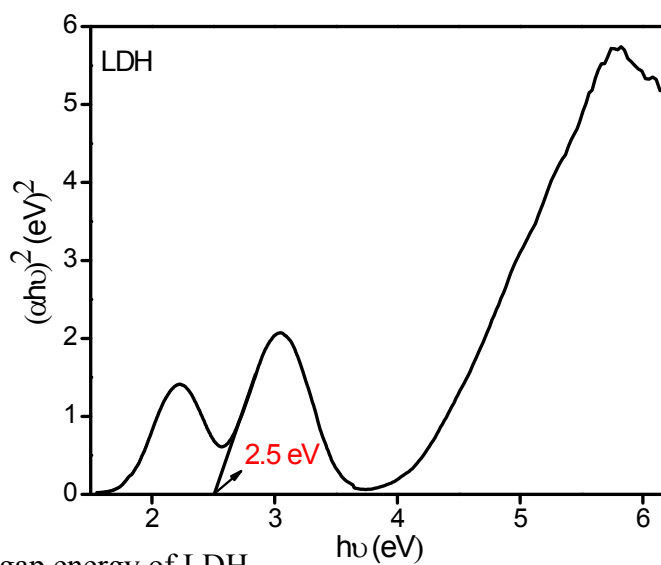

Fig. S2 Band gap energy of LDH

**Table. S1** photocatalytic benzyl alcohol conversion

| Catalysts            | Benzyl alcohol Conversion (%) | Benzaldehyde Yield(%) | Benzaldehyde Selectivity(%) |
|----------------------|-------------------------------|-----------------------|-----------------------------|
| AL <sub>0.2</sub> M  | 19                            | 17                    | 79                          |
| AL <sub>0.33</sub> M | 27                            | 24.5                  | 85                          |
| AL <sub>0.5</sub> M  | 35.5                          | 33.7                  | 88                          |
| ALM                  | 48.7                          | 46                    | 88                          |

**Table. S2** photocatalytic one-pot imine synthesis from benzyl alcohol and nitrobenzene conversion

| Catalysts | Conversion (%) |              | Yield (%)    |         |       | Imine Selectivity (%) |
|-----------|----------------|--------------|--------------|---------|-------|-----------------------|
|           | Benzyl alcohol | Nitrobenzene | Benzaldehyde | Aniline | Imine |                       |
| MCM-41    | 11             | 12.8         | 5.1          | 2       | 3.9   | 76                    |
| LDH       | 48             | 53.1         | 45           | 15      | 22    | 80                    |
| ALM       | 56.3           | 62           | 51.3         | 22      | 31    | 82                    |
| ALM-Pd    | 71             | 75           | 68           | 23      | 47.6  | 84                    |
| ALM-Au    | 82.8           | 86.4         | 77           | 23.7    | 51.3  | 85                    |
| ALM-Au/Pd | 96             | 99           | 89           | 20      | 68    | 86                    |

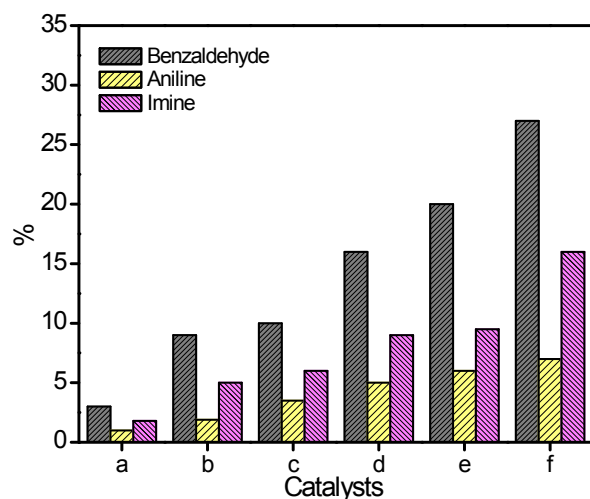**Fig. S3** Yield of benzaldehyde, aniline and imine over (a) MCM-41, (b) LDH, (c) ALM, (d)ALM-Pd, (e) ALM-Au and (f) ALM-Au/Pd under dark condition.
